# Supplementary material for: Structural analysis of the binding of the diquaternary pyridophenazine derivative dqdppn to B-DNAoligonucleotides
Source: Royal Society of Chemistry journal article supplement (doi:10.1039/b918252g), 2009-12-08
Supplement: b918252g.pdf [file b918252g.pdf]

# Structural analysis of the binding of the diquaternary pyridophenazine derivative dqdppn to B-DNA oligonucleotides

*Philip Waywell, James A Thomas and Mike P Williamson*

## Supporting Information

**SI.** The  $^{31}\text{P}$ - $^1\text{H}$  COSY spectrum of free d(AGAGCTCT)<sub>2</sub>. The intra-nucleotide correlations between the  $^{31}\text{P}$  nuclei of the phosphate groups and the H3' protons are labeled according to the position of the phosphate group.

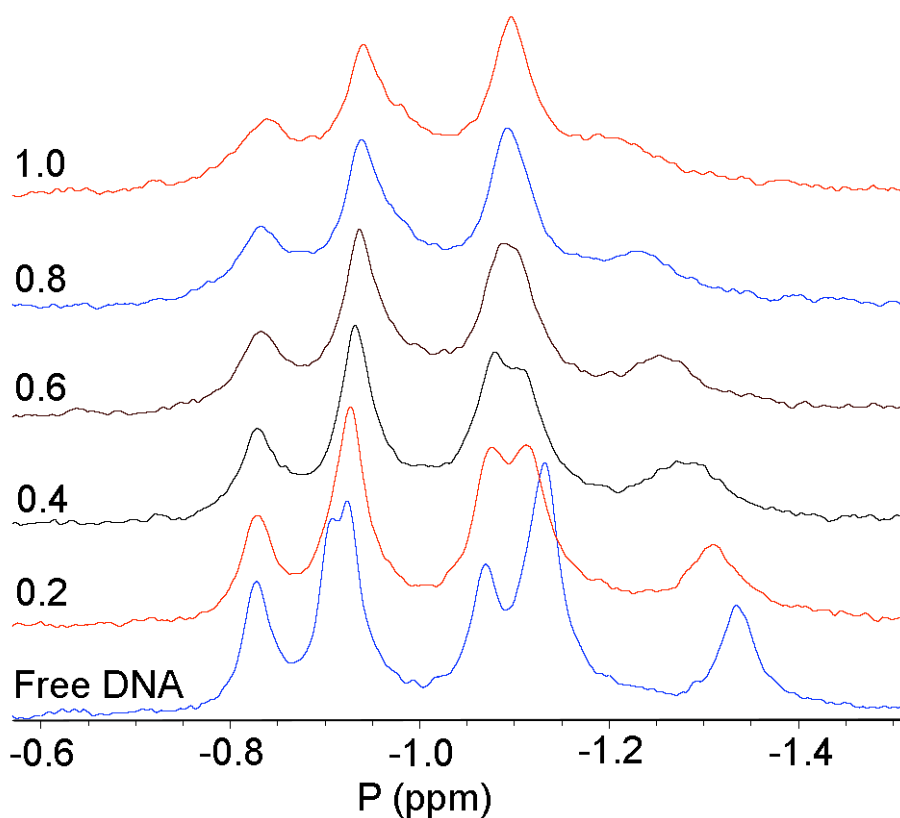

**S2.**  $^{31}\text{P}$  NMR experiments showing the step-wise addition of dqdppn to  $d(\text{AGAGCTCT})_2$ . The amount of added ligand is indicated to the left of each spectrum (in molar equivalents).

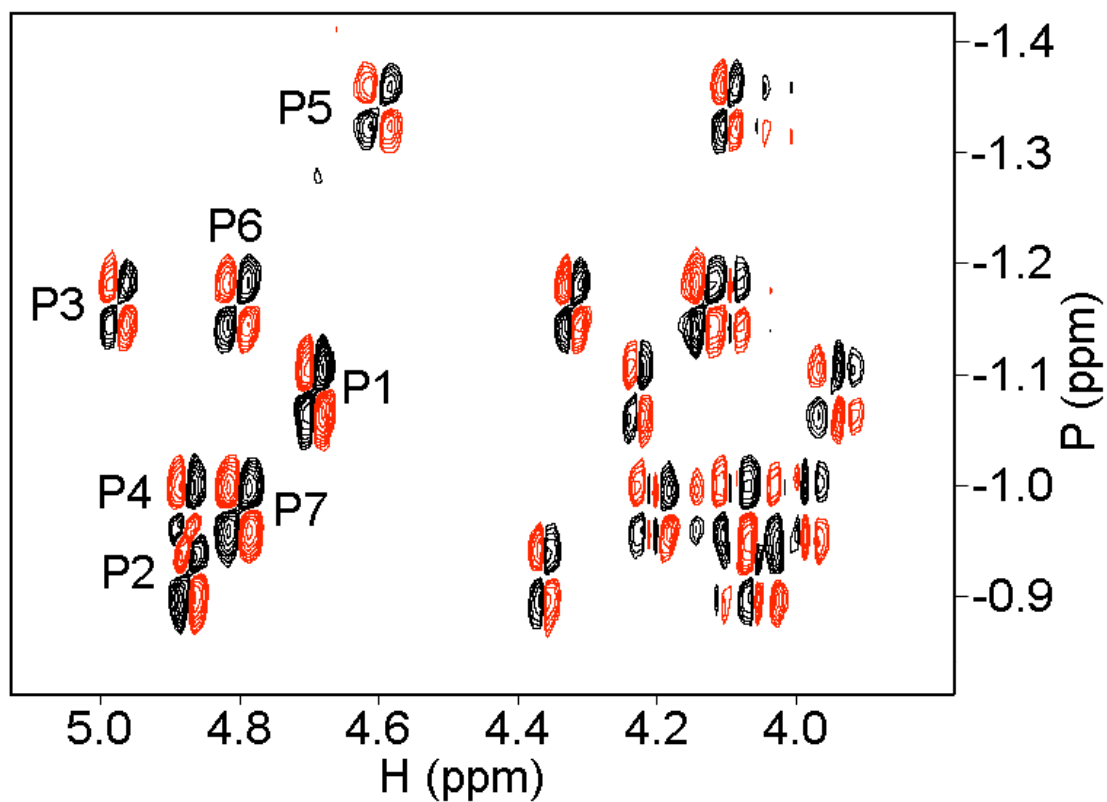

**S3.** An overlay of the 2D  $^1\text{H}/^{31}\text{P}$  correlation spectra of free  $\text{d}(\text{AGAGCTCT})_2$ , shown in red, and the complex of this sequence with 0.2 molar equivalents of  $\text{dqdpnn}$ , shown in blue.

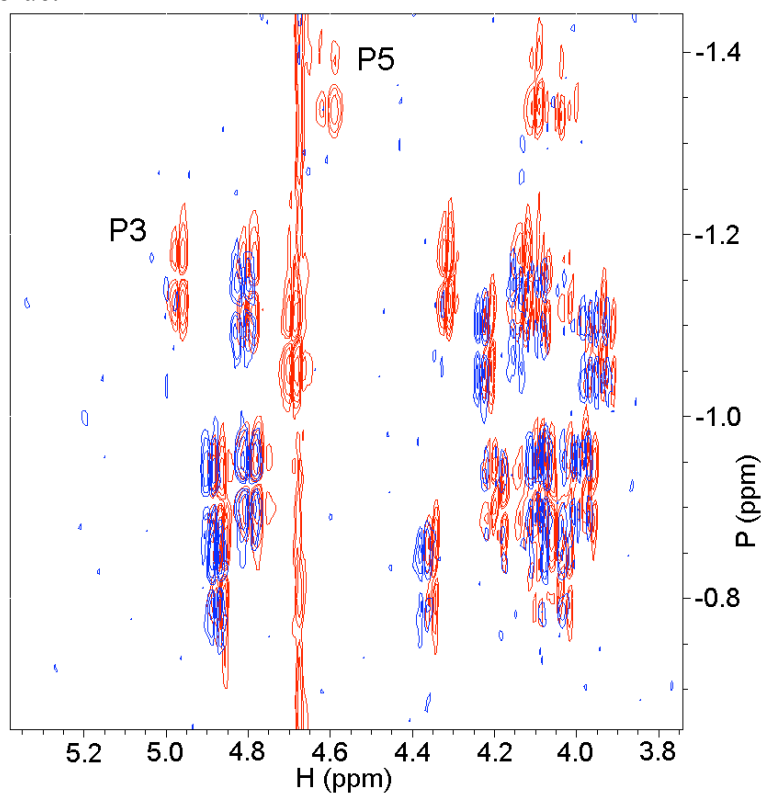

**S4.** Intermolecular NOE contacts in the 2:1 complex formed by  $\text{dqdpnn}$  and  $\text{d}(\text{GAGCTC})_2$

| <b>dqdpnn</b>   | <b>d(GAGCTC)<sub>2</sub></b> |                  |          |              |                  |              |
|-----------------|------------------------------|------------------|----------|--------------|------------------|--------------|
|                 | G1                           | A2               | G3       | C4           | T5               | C6           |
| CH <sub>2</sub> |                              |                  | 1'       | H6           |                  |              |
| H1              | 2' / 2''                     |                  |          |              |                  |              |
| H2              | 1'                           | 2' / 2'', 1', H8 | 2' / 2'' | 2', 2'', 1'  | 2' / 2'', 1'     | 2' / 2''     |
| H3              | 1'                           | 2' / 2'', 1'     | 2' / 2'' | 2' / 2'', 1' | Me, 2' / 2'', 1' | 2' / 2''     |
| H4              |                              |                  |          |              | Me               |              |
| H5              | 1'                           | 2' / 2''         |          | 2' / 2'', 1' | Me, 2' / 2'', 1' | 2' / 2'', 1' |
| H6              | 1'                           |                  |          | 2', 2'', 1'  | Me, 2' / 2'', 1' | 2' / 2'', 1' |
